1 **Comparison of Small Gut and Whole Gut Microbiota of First-Degree Relatives with Adult**  
2 **Celiac Disease Patients and Controls**

3 Rahul Bodkhe<sup>1</sup>, Sudarshan A. Shetty<sup>1,5</sup>, Dhiraj P. Dhotre<sup>1</sup>, Anil K. Verma<sup>2,6</sup>, Khushbo  
4 Bhatia<sup>2</sup>, Asha Mishra<sup>2</sup>, Gurvinder Kaur<sup>3</sup>, Pranav Pande<sup>1</sup>, Dhinoth K. Bangarusamy<sup>4</sup>, Beena P.  
5 Santosh<sup>4</sup>, Rajadurai C. Perumal<sup>4</sup>, Vineet Ahuja<sup>2</sup>, Yogesh S. Shouche<sup>1\*</sup>, Govind K.  
6 Makharia<sup>2\*</sup>

7 <sup>1</sup> National Centre for Microbial Resource, National Centre for Cell Science, Pune-411007, India.

8 <sup>2</sup> Department of Gastroenterology and Human Nutrition, All India Institute of Medical Sciences,  
9 New Delhi, India.

10 <sup>3</sup> Department of transplant Immunology & Immunogenetics, All India Institute of Medical  
11 Sciences,  
12 New Delhi, India

13 <sup>4</sup> AgriGenome Labs Pvt Ltd. Kerala, India.

14 <sup>5</sup> Current address: Laboratory of Microbiology, Wageningen University and Research, Building  
15 124, Stippeneng 4, 6708 WE Wageningen, The Netherlands.

16 <sup>6</sup>Current address: Celiac Disease Research Laboratory, Department of Pediatrics, Università  
17 Politecnica delle Marche, Ancona, Italy.

18 \*Co-corresponding authors: Yogesh S. Shouche ([yogesh@nccs.res.in](mailto:yogesh@nccs.res.in)) and Govind K. Makharia  
19 ([govindmakharia@gmail.com](mailto:govindmakharia@gmail.com))

20

21

22

23

24

25 **Abstract**

26 Recent studies on celiac disease (CeD) have shown the role of gut microbiota alterations in CeD  
27 pathogenesis. Whether this alteration in the microbial community is the cause or effect of the  
28 disease is not well understood, especially in adult onset of disease. The first-degree relatives  
29 (FDRs) of CeD patients may provide an opportunity to study gut microbiome in pre-disease state  
30 as FDRs are genetically susceptible to CeD. By using 16S rRNA gene sequencing, we observed  
31 that ecosystem level diversity measures (except in the duodenum) were not significantly different  
32 between the disease condition (CeD), pre-disease (FDR) and control subjects. However,  
33 differences were observed at the level of amplicon sequence variant (ASV), suggesting  
34 alterations in specific taxa between pre-diseases and diseased condition. Duodenal biopsies  
35 showed higher differences in ASVs compared to faecal samples indicating larger disruption of  
36 microbiota at disease site. Increased abundance of specific *Helicobacter* ASVs were observed in  
37 duodenum of CeD when compared to FDR ( $p < 0.01$ ). In case of fecal samples CeD microbiome  
38 is characterized by reduced abundance of beneficial taxa such as *Akkermansia*, *Ruminococcus*  
39 and *Actinomyces*. In addition, predicted functional metagenome showed reduced ability of gluten  
40 degradation by CeD faecal microbiota in comparison to FDRs and controls.

41

42

43

44

45

46

47

## 48 **Introduction**

49 Celiac disease (CeD) is a common, chronic immune mediated enteropathy of the small intestine  
50 which affects approximately 0.7% of the global population (Singh et al., in press). Once thought  
51 to be uncommon in Asia, CeD is now prevalent in many Asian countries including India  
52 (Makharia et al., 2011). CeD is caused by the consumption of gluten proteins present in cereals  
53 such as wheat, barley and rye in genetically susceptible individuals (Caminero et al., 2015).  
54 While many genes are involved in the development of CeD, thus far only the presence of HLA-  
55 DQ2 or DQ8 haplotype is considered to be essential (Sanz and Pama, 2011). Additional factors  
56 that contribute to pathogenesis include other co-genetic factors (genome wide association studies  
57 have identified several markers), wheat-related factors (age of ingestion, type and quantity of  
58 wheat) and the way gluten is metabolized in the intestine (Kagnoff, 2007; van de Wal et al.,  
59 1998; Verdu et al., 2015). About 30-40% of the gluten protein consists of glutamine and proline.  
60 Since humans are unable to enzymatically break the molecular bonds between these two amino-  
61 acids, many immunogenic peptides are produced (Jabri and Sollid, 2006). There remains a  
62 possibility that enzymes secreted by the small intestinal microbiota convert some of these  
63 immunogenic peptides to non-immunogenic peptides.  
64 While 20-30% of individuals in many countries including India are genetic susceptibility to  
65 develop CeD and the majority of them are exposed to wheat, only 1% of them develop CeD.  
66 This brings forth the role of other factors such as the gut microbiota in the pathogenesis of CeD  
67 (Sánchez et al., 2012). Recently, numerous studies have highlighted the potential role of gut  
68 microbiota in inflammatory gastrointestinal diseases (de Sousa Moraes et al., 2014; Fernandez-  
69 Feo et al., 2013; Png et al., 2010; Rivière et al., 2016; Schneeberger et al., 2015; Zeng et al.,  
70 2017).

71 However, these changes in the microbial community structure and function in patients with CeD  
72 are cause or effect of the disease state remains unclear to date. In order to answer this question,  
73 one has to examine the status of the gut microbiota in the pre-disease state. Recently two studies  
74 investigated the microbiota of at risk children who developed CeD few years after birth. One  
75 study observed an increase in *Bifidobacterium breve* and *Enterococcus* spp. in infants that  
76 developed active CeD (Olivares et al., 2018). Another study, did not observe any association  
77 between microbiota composition and development of CeD during the age of 9 and 12 months  
78 (Rintala et al., 2018). However, potential microbiota related triggers for development of CeD in  
79 later adult life still remain unclear. While 70-80% percent of first-degree relatives (FDRs) of  
80 patients with CeD have HLA-DQ2/DQ8 haplotype (compared to 30% in the general population);  
81 only approximately 8.5% of FDRs develop CeD (Singh et al., 2015). Thus, the question arises;  
82 why do only few FDRs develop CeD and what is the role of the gut microbiome in disease  
83 protection? Indirect evidence of altered microbiota in relatives of patients with CeD is suggested  
84 by significantly lower levels of acetic acid and total short chain fatty acids, and higher faecal  
85 tryptic activity (Tjellström et al., 2007). Nevertheless, to date there is no information on the gut  
86 microbial composition and function in FDRs of patients with CeD, especially using the latest  
87 sequencing approaches. Additionally, it is important to explore the status of the microbiota in  
88 both the small intestine, the site of the disease, and feces, as representative of whole gut  
89 microbiome. To test the hypothesis that gut microbiome of FDR is different from CeD and could  
90 potentially play an important role in the pathogenesis of CeD, we explored the composition of  
91 both small intestinal and the whole gut microbiome using Illumina MiSeq in a subset of patients  
92 with CeD, first degree relatives and controls. We further investigated the potential microbial  
93 functions that are characteristic of FDR and CeD microbiota.

94 **Results**

95 **Comparison of faecal and duodenal microbial community in the study cohort**

96 The characteristics of the study subjects have been summarized in the Table 1. All the  
97 participants were on staple gluten containing diet during sampling for this particular study. After  
98 diagnosis of CeD the patients underwent therapy with dietary recommendation to avoid gluten in  
99 daily diet. However, in the present study, we do not include samples after dietary changes. Both  
100 duodenal biopsies and faecal samples were included to investigate differences in both site-  
101 specific and whole gut bacterial diversity and community structure in patients with CeD, FDRs  
102 and controls. The microbial community was different between the faecal and duodenal biopsies  
103 irrespective of whether they were from CeD, FDR or DC groups (Supplementary figure S1a),  
104 (Analysis of similarities; ANOSIM statistic R: 0.4998, Significance: 0.001). Analysis of alpha  
105 diversity between the sampling sites suggested no significant differences between the sampling  
106 sites (Supplementary figure S1b). Further analyses were carried out separately for faecal and  
107 duodenal samples in different groups.

108 **Site specific bacterial community structure in FDRs, CeD and controls**

109 *Duodenal and faecal microbiota composition and structure is distinct in FDRs, CeD and*  
110 *control groups:*

111 To investigate if patients with CeD, FDRs or DC had site specific dissimilarities in microbiota  
112 composition, we analyzed microbiome composition of duodenal and faecal samples separately.  
113 Alpha diversity was determined using Shannon index, pairwise comparisons of alpha diversity in  
114 duodenal biopsies between FDRs, CeD and controls suggested no significant differences (Figure  
115 1a). Similarly, for faecal samples no significant differences were observed for alpha diversity  
116 between diagnosis groups (Figure 1b).

117 Further, unconstrained comparison based on Bray-Curtis revealed no significant separation for  
118 duodenal biopsy microbiota between CeD, FDRs and control samples (Analysis of similarities;  
119 Anosim test; R-statistic =0.0014,  $p = 0.427$  Figure 1c). In case of faecal microbiome, comparison  
120 based on Bray-Curtis distances between diagnosis groups was done. Similar to the duodenal  
121 biopsy microbiome it was not significantly different between diagnosis groups (Analysis of  
122 similarities; Anosim test; R-statistic = 0.051,  $p = 0.058$  Figure 1d).

123

#### 124 **Taxonomic differences in microbiota from duodenal biopsies of FDRs CeD, and controls:**

125 At phylum level in duodenal biopsy samples Actinobacteria, Bacteroides, Euryarchaeota,  
126 Firmicutes and Proteobacteria were the dominant members (Additional file figure S2). When  
127 performed pairwise comparison Actinobacteria ( $p= 0.013$ ) and Bacteroides (0.02) were found be  
128 significantly increased in predisease state (FDR) in comparison to controls. Moreover, at order  
129 level FDR showed significant more abundance of Actinomycetales and Clostridiales than the  
130 control duodenal biopsies ( $p< 0.05$ ) (Additional file figure S3).

131 To further investigate differences at lower taxonomic level between diagnosis groups, we used  
132 the DESeq2 package with default parameters.

133

#### 134 **Changes in taxonomic abundance in the biopsies of FDRs in comparison to controls:**

135 Differential abundance analysis identified bacterial genera *Ruminococcus*, *Intestinibacter*,  
136 *Eubacterium* and *Anaerostipes* belonging to Clostridiales to be at least 21 fold higher in  
137 abundance in FDR biopsies (Figure 2a). Order Actinomycetales ( $p=0.02$ ) and its genus  
138 *Actinomyces* were also observed in higher abundance in FDRs in comparison with controls.  
139 Notably, we observed differentially higher abundance of opportunistic pathogenic genera

140 *Helicobacter* and *Prevotella* in duodenum of FDRs (>23 fold change,  $p < 0.01$ ). In total a group  
141 17 genera were significantly more abundant in FDR biopsy samples in comparison to control  
142 biopsies ( $p < 0.01$ ) and these genera were at least 21 fold more in abundance. However, on the  
143 other side this analysis also identified 10 genera that were significantly depleted in FDR samples  
144 ( $> \log_2$  Fold Change of 20,  $p < 0.01$ ), including ASVs belonging to *Ruminococcus*, *Blautia*,  
145 *Eubacterium* and *Intestinibacter*. Among these the most significant difference in a bacterial  
146 genera was *Eubacterium* which was 26 fold decreased in FDR samples ( $p < 0.01$ ).

147 **Changes in taxonomic abundance in the biopsies of patient with Celiac disease in**  
148 **comparison to controls:**

149 Next we compared microbial composition between CeD and controls to explore differentially  
150 abundant and reduced taxa in disease state. 35 ASVs were found to be at least 22-fold higher in  
151 abundance in duodenal biopsies of CeD group than the control biopsy samples. These ASVs  
152 were belonging to *Blautia*, *Catenibacter*, *Helicobacter*, *Lactobacillus*, *Megasphaera*,  
153 *Methanomassillicoccus* and *Prevotella* (Figure 2b). The most significant difference in a bacterial  
154 species were associated with *Lactobacillus*, *Methanomassiliicoccus*, *Catenibacter* and  
155 opportunistic pathogen *Helicobacter*, which were more than 22 fold higher in abundance in CeD  
156 biopsy samples than those of control samples ( $p < 0.01$ ). Furthermore, *Megasphaera* and *Blautia*  
157 genera were also in higher abundance in CeD samples. Analysis also identified 34 ASVs  
158 belonging to 9 genera that were significantly depleted in CeD samples ( $p < 0.01$ ). The majority  
159 of these genera (4/9) were belonging to the orders Clostridiales including genera *Ruminococcus*,  
160 *Intestinibacter*, *Blautia* and *Eubacterium*. Among these, the most depleted taxon was the short  
161 chain fatty acid (SCFA) producer *Ruminococcus*, which was 24 fold reduced in samples from

162 those with CeD ( $p < 0.01$ ). Moreover, higher abundance of genus *Turicibacter*, and *Moraxella*  
163 was significantly associated with a control microbial configuration in comparison with CeD.

164 **Changes in taxonomic abundance in the biopsies of patient with Celiac disease in**  
165 **comparison to First degree relatives of CeD:**

166 Next, to identify the differentially abundant taxa between predisease and disease state we did  
167 similar analysis for CeD and FDR groups. DESeq2 identified a group of 27 taxa belonging to  
168 Firmicutes and Proteobacteria that were significantly more abundant in CeD duodenal samples.  
169 These taxa were found to be at least 22-fold higher in abundance and were belonging to genera  
170 *Blautia*, *Eubacterium*, *Helicobacter*, *Lactobacillus*, *Megasphaera* and *Akkermansia*. Similar to  
171 the comparison with controls, bacterial genera *Methanomassillicoccus*, *Catenibacter* and  
172 *Helicobacter* were the most significantly abundant bacterial genera in CeD duodenum samples in  
173 comparison to FDRs ( $>24$  fold change,  $p < 0.01$ ). In addition, *Moraxella* and *Eubacterium* were  
174 also the other most differential abundant taxa were associated with duodenum in disease  
175 condition ( $>24$  fold change,  $p < 0.01$ ).

176 We also identified 59 taxa belonging Firmicutes and Actinobacteria were significantly depleted  
177 in CeD samples ( $p < 0.01$ ). Also the order Clostridiales and the beneficial genera affiliated to it  
178 such as *Ruminococcus*, *Intestinibacter* and *Anaerostipes* were also significantly reduced in CeD  
179 biopsies.

180 Moreover, *Gemella* a commensal genus of the upper respiratory tract, gluten degrader  
181 *Actinomyces* and genera *Streptococcus* and *Bifidobacterium* were also found to be significantly  
182 low in abundance in CeD (Figure 2c).

183

184 **Taxonomic differences in the faecal microbiota in patients with CeD, FDRs and controls**



185 Phylum level comparison of microbial community between CeD, FDRs and controls  
186 demonstrated that Proteobacteria, Actinobacteria, Bacteroidetes, Euryarchaeota and Firmicutes  
187 constitute the majority of the faecal microbiota (Additional file figure S4). However in contrast  
188 to the biopsy samples Bacteroidetes was found to be marginally decreased in FDR samples in  
189 comparison to controls ( $p=0.058$ ). Similar trend was observed for order Bacteroidales, it showed  
190 marginal lower abundance in FDRs ( $p=0.054$ ). However, order Clostridiales was significantly  
191 abundant in FDRs in comparison to controls ( $p=0.017$ ) (Additional file figure S5).

192

### 193 **Changes in taxonomic abundance in the feces of FDR in comparison with Controls**

194 In faeces of FDRs mostly the significant depletion (22/30) of beneficial taxa was observed. Only  
195 the archaeal genus *Methanomassiliicoccus* was observed differentially abundant in FDRs faecal  
196 samples than those of control samples (Figure 3a). However, 7 ASVs belonging to same genus  
197 were significantly reduced in FDRs. Further analysis identified more than 23 fold ( $p < 0.01$ )  
198 reduction in bacterial genera which are known for a healthy microbiota homeostasis, which  
199 include *Akkermansia*, *Lactobacillus* and *Dorea*.

200

### 201 **Changes in taxonomic abundance in the feces of CeD in comparison with Controls**

202 Similar to the FDRs, mostly the depletion of bacterial taxa was observed in CeD faecal samples  
203 when compared with controls. Moreover, the same ASVs of *Akkermansia*, *Lactobacillus* and  
204 *Dorea* were significantly depleted in CeD (Figure 3b). In addition *Prevotella* showed 23 fold ( $p <$   
205  $0.01$ ) reductions in abundance in CeD. On the other hand, DESeq2 identified genus  
206 *Lactobacillus* to be in significant abundance in disease condition (CeD) in comparison to control  
207 fecal samples.

## 208 **Changes in taxonomic abundance in the feces of CeD in comparison with FDRs**

209 To explore differentially abundant taxa in disease condition in comparison to predisease state, we  
210 compared microbial composition between CeD and FDRs. In disease state mostly a significant  
211 depletion was observed for physiologically important bacterial taxa compared with FDRs faeces  
212 (Figure 3c). Order Clostridiales and genera *Intestinibacter*, *Dorea* and *Blautia* belonging to this  
213 order were significantly in lower abundance in CeD. In addition, *Pediococcus* was found to be  
214 23 fold reduced abundance in CeD, however ASVs affiliated with *Lactobacillus* were more than  
215 24 fold differentially abundant in CeD in comparison FDRs.

216

## 217 **Imputed metagenome of FDR and CeD duodenal microbiome shows reduced proportion of** 218 **genes involved in gluten metabolism in comparison to that of the controls**

219 In addition to differentially abundant microbial taxa, different study groups might have altered  
220 metabolic potential. Of specific interest were the enzymes related to glutenases as they play a  
221 role in breakdown of gliadin residues. We followed Piphillin workflow to predict functional  
222 profile of fecal microbial community (Iwai et al., 2016). A total of 159 KEGG orthologies (KO)  
223 were significantly different between diagnosis groups (Supplementary Table 1). Among these the  
224 KO abundance for Xaa-pro dipeptidase (K01271, Prolidase) enzyme which is known to have role  
225 in gluten degradation was found to be significantly reduced in CeD as compared to FDR and  
226 controls (figure 4).

227

## 228 **Discussion**

229 The aim of the present study was to investigate differences in the duodenal and faecal microbiota  
230 of pre-diseased state i.e. FDRs subjects compared to diseased state i.e. CeD and controls. The

231 FDR group was included for two main reasons: 1) They represent a population which is  
232 genetically-susceptible to develop CeD; 2) They provide a unique opportunity to identify  
233 features of the host as well as of the associated microbiota that may be involved in the protection  
234 against developing CeD. We collected both duodenal biopsies and faecal samples to investigate  
235 both local and overall changes in the microbiota in FDR, patients with CeD and controls.  
236 To the best of our knowledge, reports on site specific microbiota patterns in adult patients with  
237 CeD remain scarce, and no results on both site specific and whole gut microbiome on FDRs have  
238 been reported to date. Present study provides an overall view on differences of both site-specific  
239 changes as well as changes in the faecal microbiota of FDRs, CeD and DC.  
240 At lower taxonomic level, several taxa were identified to be differentially abundant between the  
241 diagnosis groups. Notably, ASVs related to *Helicobacter*, *Ruminococcus*, *Megasphaera*, and  
242 *Lactobacillus*, showed higher (> 24) log<sub>2</sub> fold change in CeD biopsy samples. When we  
243 performed analysis at species level, abundance of an ASV1811, *H. pylori* was higher in CeD  
244 compared to controls and FDR subjects. In turn FDR were found to harbor higher abundance of  
245 ASV2016 and ASV4095 belonging to *H. pylori* in comparison to controls (Supplementary  
246 information). As per previous reports, CeD patients with *H. pylori* gastritis were found with  
247 increased numbers of intraepithelial lymphocytes in the duodenal mucosa (Villanacci et al.,  
248 2006). In contrast, there are also reports which failed to reveal a relationship between *H. pylori*  
249 and CeD and found that *H. pylori* presence is inversely associated CeD (Lebwohl et al., 2013).  
250 However, in our study the ASV which is abundant in CeD is different than those ASVs which  
251 are enriched in FDR. Our analysis included finer sequence level variation and differentiated  
252 single nucleotide level difference (Callahan et al., 2016). In view of intra-genomic differences in  
253 16S rRNA gene, we compared the 16S rRNA gene copies of *H. pylori* in publically available

254 genomes. We observed that on average the *H. pylori* genome has two copies of 16S rRNA gene  
255 and we did not observe differences between the two copies within a single genome in the V4  
256 region investigated here (Supplementary information text page 3-7). Therefore, future studies  
257 need to focus on strain level variations and functional aspects of *H. pylori* in regards with CeD  
258 using metagenomics and functional omics. Other ASVs which showed higher abundance in CeD  
259 as compared to FDR and DC and lower abundance in FDR as compared to DC are *Megasphaera*  
260 and *Catenibacterium*. One more important observation from differential abundance results is  
261 decreased abundance of *Ruminococcus* in CeD as compared to FDR and CeD. *Ruminococcus* is  
262 considered to be a keystone taxa with influence on the microbial community and responsible for  
263 the major fraction of butyrate production in the gut (Morrison and Preston, 2016; Shetty et al.,  
264 2017; Ze et al., 2012).

265 Duodenal microbiota of FDR is characterized by increased abundance of ASVs related to  
266 *Actinomyces*, *Streptococcus*, *Bifidobacterium* and *Anaerostipes*. These taxa are known to possess  
267 gluten degrading enzymes, probiotic properties and ability to produce SCFA respectively  
268 (Barrangou et al., 2009; Couvigny et al., 2015; Fernandez-Feo et al., 2013; Morrison and  
269 Preston, 2016; Rivière et al., 2016). Moreover, the strain belonging to *Bifidobacterium* was  
270 reported to prevent gluten-related immunopathology in mice (McCarville et al., 2017). Higher  
271 number of these taxa in small intestine of FDRs may indicate protective role of these taxa in pre-  
272 disease state.

273 In comparison to duodenal biopsies, less numbers of ASVs were differentially abundant between  
274 diagnosis groups in faecal samples. This indicates more disrupted microbiome at disease site  
275 than overall gut microbiome and highlights the importance of inclusion of biopsy samples in  
276 present study.

277 In faecal samples, CeD showed significant enrichment of ASVs affiliated to genus *Lactobacillus*  
278 in comparison to FDR and DC. This is in line with previous study in which, higher abundance of  
279 *Lactobacillus* was observed in oral microbiome of patients with CeD (Tian et al., 2017).  
280 Moreover, there are reports stating that the certain *Lactobacillus* species degrade gliadin and  
281 increases the availability of antigenic peptides (Engstrom et al., 2015). In the present study,  
282 higher abundance of *Lactobacillus* in CeD microbiota may indicate their ability to breakdown  
283 gluten into pro-inflammatory peptides in the small intestine. Another important observation from  
284 differential abundance is the lower abundance of *Dorea* and *Akkermansia* in faecal sample of  
285 CeD. Both of these taxa are known to produce SCFAs which in turn strengthens the health of  
286 enterocytes and inhibits intestinal inflammation (Ohira et al., 2017).  
287 Lower abundance of *Lactobacillus* and higher abundance of *Dorea* in FDR and DC in  
288 comparison to CeD indicates that the faecal microbiota of FDR is more similar to the microbiota  
289 of control samples. However, *Akkermansia* ASVs were in more abundance in control as  
290 compared to FDR.  
291 Overall, microbiota of DC can be characterized with enriched abundance of SCFA producing  
292 core bacterial taxa, such as *Ruminococcus* and *Akkermansia* in case of biopsy and faecal samples  
293 respectively. ASVs such as *Megasphaera*, *Ruminococcus* and *Helicobacter* in duodenal biopsy  
294 of FDR showed higher abundance when compared with control but they are reduced in  
295 comparison with disease state CeD. Moreover, *Dorea* showed similar abundance pattern in  
296 faecal samples. In our study, the higher abundance of known pathogenic bacteria such as  
297 *Helicobacter* (well-known bacteria to be associated with intestinal inflammation) and reduced  
298 abundance of health associated bacteria such as *Akkermansia*, *Ruminococcus* (bacteria known for

299 the anti-inflammatory properties) and *Actinomyces* (a well-known gluten degrader) emerged as  
300 the characteristic of the CeD microbiota.

301 Through metagenome prediction method we found that the gene abundance for Xaa-pro  
302 Dipeptidase enzymes was less in CeD as compared to FDR and controls. This enzyme shows a  
303 high specificity for proline residues present in gluten and hydrolyze the peptide bond (Park et al.,  
304 2004). These observations suggest that the FDR and CeD duodenal microbiota differs in the  
305 bacterial composition and that loss or gain of specific bacteria capable of gluten degradation.  
306 This may impact gluten processing and the presentation of immunogenic gluten epitopes to the  
307 immune system in the small intestine. However, link between the predicted metagenome and gut  
308 microbiome needs to be validated with *in-vitro* enzyme assay.

309 The present study was conducted to investigate if the duodenal and faecal microbiotas of FDR of  
310 CeD patients are different from that of CeD and controls. Our observations from PCoA (Figure  
311 1c and 1d) and differential abundance (Figure 2 and 3) suggest variation at lower taxonomic  
312 levels. These potential species and/or strain level variations and functional aspects need to be  
313 investigated using shotgun metagenomics and functional omics in follow-up studies.

314 However, metagenomic studies of biopsy samples remain a challenge because of high proportion  
315 of host DNA. Thus, predictive metagenomics using 16S rRNA gene as a practical solution was  
316 employed for biopsies. In this initial exploratory study, we investigated the gut microbiome with  
317 respect to the disease status only and future studies considering other confounding factors such  
318 as diet, body mass index age, sex, frequency and quantity of gluten intake among others will be  
319 required for a better understanding the gut microbiome in CeD and FDRs. Additionally, the  
320 control group in our study was not healthy subjects but patients with functional dyspepsia. These

321 subjects were used as proxy since invasive sampling procedures such as endoscopy from  
322 clinically healthy subjects is not permitted under the institutional regulations.  
323 In summary, present study highlights the specific differences in the microbiota of FDR compared  
324 to that in patients with CeD and controls. Difference in FDR microbiota in both the faecal and  
325 duodenal biopsy samples compared to CeD suggests microbiota of FDR have unique features.  
326 Analysis of single nucleotide level variation provides a finer resolution and suggests that changes  
327 in strain level features need to be investigated in CeD. These unique features should be addressed  
328 in future mechanistic studies to understand etiopathogenesis of CeD.

329 **Conclusions:** Significant differences at ASV level suggest that specific bacterial taxa like  
330 *Helicobacter* may be important for pathogenesis of CeD. Higher abundance of beneficial  
331 bacterial taxa especially SCFA producers in controls suggest that there may be a protective role  
332 of these taxa in CeD development. Moreover, the predicted differences in gluten metabolism  
333 potential by FDR and CeD microbiota point towards the need for investigating functional  
334 capabilities of specific bacterial taxa in healthy FDR and CeD patients.

## 335 **Methods**

### 336 **Patients and Methods**

#### 337 **Human subjects, duodenal biopsies and faecal sample collection**

338 A total of 62 subjects participated in this study including 23 treatment naïve patients with CeD  
339 [all HLA-DQ2/DQ8+, having high titre of anti-tissue transglutaminase antibodies (tTG Ab) and  
340 having villous abnormalities of modified Marsh grade 2 or more], 15 healthy first-degree  
341 relatives of patients with CeD [having normal titre of anti-tTG Ab and having no villous  
342 abnormalities of modified Marsh grade 0 or 1], and 24 controls (patients with Hepatitis B Virus  
343 carriers or those having functional dyspepsia; having normal titre of anti-tTG Ab and having no

344 villous abnormalities) (Table 1). Duodenal biopsies and faecal samples were collected from each  
345 of the above mentioned subjects at All India Institute of Medical Sciences, New Delhi, and sent  
346 to National Centre for Cell Sciences, Pune for microbiome analysis. The ethics committees of  
347 All India Institute of Medical Sciences, New Delhi, and National Centre for Cell Sciences, Pune,  
348 India approved the study. Informed and written consent was obtained from all the participants.  
349 Further details of patients and controls have been provided in the (Supplementary file 1: Table  
350 2).

### 351 **DNA extraction and 16S rRNA gene sequencing**

352 Total DNA was extracted from duodenal biopsies using QIAGEN DNeasy Blood and Tissue kit  
353 (QIAGEN, Germany) and faecal samples using the QIAamp fast DNA stool Mini Kit (QIAGEN,  
354 Germany) according to the manufacturer's instructions. We used Illumina MiSeq sequencing to  
355 determine the bacterial composition of the duodenal biopsies and faecal samples. PCR was set up  
356 in 50 µl reaction using AmpliTaq Gold PCR Master Mix (Life Technologies, USA) and with 16S  
357 rRNA V4 variable region specific bacterial primers 515F (5'-GTGCCAGCMGCCGCGGTAA-  
358 3') and 806R (5'-GGACTACHVGGGTWTCTAAT-3')

### 359 **Sequence processing and bacterial community analysis**

360 Illumina Miseq platform rendered a total of 76058052 raw 16S rRNA sequence reads for the 102  
361 faecal and biopsy samples of the diagnosis groups, with an average of  $745667 \pm 194667$  reads per  
362 sample. Adapter sequences were trimmed by using Cutadapt (1.18) tool (Martin, 2011) and  
363 trimmed reads were pooled as Fasta.gz file format for further analysis in DADA2 (v 1.6.0)  
364 pipeline (Callahan et al., 2016). In the first step reads were inspected for read quality profile, the  
365 read quality score was decreased ( $<30$ ) after 240 bases for forward read and 160 bases for  
366 reverse reads. We truncated the forward reads at position 240 (trimming the last 10 nucleotides)



367 and reverse reads at position 160 (trimming the last 90 nucleotide). After quality filtering and  
368 removal of bases with a total of 70502947 (92.69%) high-quality reads of the 16S rRNA  
369 amplicons were obtained, with an average  $691205 \pm 181263$  reads per sample, ranging from  
370 325350 to 1207169 among samples (Supplementary Table 3). Finally, taxonomic assignment  
371 was done by the naive Bayesian classifier method with default setting as implemented in  
372 DADA2, against Human Intestinal 16S rRNA gene reference taxonomy database (HITdb v  
373 1.00). Briefly, HITdb is a 16S rRNA gene database based on high-quality sequences specific for  
374 human intestinal microbiota, this database provides improved taxonomic up to the species level  
375 (Ritari et al., 2015). Unassigned chimeric and sequences of chloroplast and mitochondria were  
376 excluded from downstream analysis. Taxonomic assignment successfully mapped 6567144  
377 ASVs (Amplicon Sequence Variants), with an average of  $64383 \pm 29929$  ASVs per sample.  
378 Finally, from these ASVs, ASV table was constructed and the ASVs generated by the  
379 contaminants were removed by using decontam software (Davis et al., 2017) and the output ASV  
380 table was used for downstream analyses.

381 Microbial diversity and composition analysis was done using the R-package phyloseq (v1.22.3)  
382 (McMurdie and Holmes, 2013) and microbiome R package (v1.0.2) (Leo and Shetty, 2017). To  
383 test for similarities in bacterial communities between sample types and diagnosis groups  
384 Analysis of Similarities (ANOSIM) on Bray-Curtis distances was used. ANOSIM is a function in  
385 vegan package (v 2.4-4) to calculate significance of PCoA clustering based on the Bray-Curtis  
386 distances (Dixon, 2003).

387 To identify differentially abundant ASVs in pairwise comparisons between diagnosis groups we  
388 used DESeq2 (v1.18.0) (Love et al., 2014). All ASVs that were significantly ( $\alpha = 0.01$ )  
389 different in abundance between the diagnosis groups were reported and were adjusted for

390 multiple comparisons using the Benjamini-Hochberg, false discovery rate procedure. Data was  
391 visualized using ggplot2 (v 2.2.1) in R (Hadley Wickham, 2016).

### 392 **Metagenomic Imputation**

393 Piphillin tool was used to infer metagenome from 16S rRNA ASV counts table and  
394 representative sequence of each ASV. Briefly, this tool predicts metagenomes with high  
395 accuracy by leveraging the most-current genome reference databases (Iwai et al., 2016). It uses  
396 direct nearest-neighbor matching between 16S rRNA amplicons and genomes to predict the  
397 represented genomes. Latest version (May 2017) of KEGG database and 97% of the identity  
398 cutoff was selected for the prediction. The output from Piphillin was further analyzed by  
399 STAMP statistical tool, ANOVA with post hoc Tukey-kramer test was used to identify  
400 statistically different KEGG orthologies between diagnosis groups (Parks et al., 2014).

401

### 402 **List of abbreviations**

403 CeD: Celiac disease, DC: Diseased controls (dyspeptic), FDR: First degree relatives. ASV:  
404 Operational taxonomic unit, rRNA: Ribosomal Ribonucleic acid, PCoA: Principal coordinates  
405 analysis.

### 406 **Declarations**

#### 407 **Acknowledgement**

408 We acknowledge the help of Aishwairya Sharma, a dietician, who counselled the patients for  
409 gluten free diet. The authors are grateful to Dr. Nachiket Marathe for fruitful discussion related  
410 to the project. The authors thank Johanna Gutleben for proofreading the manuscript. We  
411 sincerely acknowledge the support of each participant of this study who accepted to participate in  
412 this study.

413 **Funding**

414 We acknowledge the support of the Food and Nutrition Division of Department of  
415 Biotechnology, Government of India who provided the research grant for this study (Sanction no  
416 BT/PR-14956/FNS/20/497/2010).

417 **Availability of data and materials**

418 Sequence data generated in this study is available from the NCBI Sequence Read Archive within  
419 the Bioproject ID accession PRJNA385740.

420 (<https://www.ncbi.nlm.nih.gov/bioproject/?term=PRJNA385740>) and to reproduce the analysis

421 done in R, the R Markdown file and required data are available at

422 [https://github.com/raahulnccs/Comparison-of-Small-Gut-and-Whole-Gut-Microbiota-of-First-](https://github.com/raahulnccs/Comparison-of-Small-Gut-and-Whole-Gut-Microbiota-of-First-Degree-Relatives-with-Adult-Celiac-Disease)

423 [Degree-Relatives-with-Adult-Celiac-Disease](https://github.com/raahulnccs/Comparison-of-Small-Gut-and-Whole-Gut-Microbiota-of-First-Degree-Relatives-with-Adult-Celiac-Disease).

424 Conflicts of interest: All the authors disclose no conflict of interest

425 **Authors Contributions:**

426 The research study was conceptualized, designed and supervised by GKM, YSS and VA. Patient

427 recruitment, diagnosis and endoscopic examination was done by GKM; HLA testing was done

428 by GK; biological sample collection (duodenal biopsy/stool) storage and maintenance was done

429 by AKV, KB and AM. The extraction of genomic DNA was done by RB and PP. DKB, BPS and

430 RCP were involved in amplicon sequencing. Bioinformatics analysis for amplicon data was done

431 by SAS, DPD and RB. Data acquisition, data interpretation and drafting of the manuscript was

432 done by SAS and GKM. YSS, DPD and VA critically reviewed the manuscript. All authors have

433 read and approved the final manuscript.

434

435

436

437 **Ethics approval and consent to participate**

438 The Ethics Committees of All India Institute of Medical Sciences, New Delhi, and National  
439 Centre for Cell Sciences, Pune, India approved the study. Informed and written consent was  
440 obtained from all the participants.

441 Consent for publication

442 Not applicable.

443 **Conflict of Interest**

444 All authors have no conflict of interest to declare. Authors Dhinoth K. Bangarusamy, Beena P.  
445 Santosh and Rajadurai C. Perumal were employed by company AgriGenome Labs Pvt Ltd.  
446 Kerala, India. All other authors declare no competing interest.

447

448

449

450

451

452

453

454

455

456

457

458

459

460 **References:**

- 461 Barrangou, R., Briczinski, E. P., Traeger, L. L., Loquasto, J. R., Richards, M., Horvath, P., et al.  
462 (2009). Comparison of the Complete Genome Sequences of *Bifidobacterium animalis*  
463 subsp. *lactis* DSM 10140 and BI-04 †. *J. Bacteriol.* 191, 4144–4151. doi:10.1128/JB.00155-  
464 09.
- 465 Callahan, B. J., McMurdie, P. J., Rosen, M. J., Han, A. W., Johnson, A. J. A., and Holmes, S. P.  
466 (2016). DADA2: High-resolution sample inference from Illumina amplicon data. *Nat.*  
467 *Methods* 13, 581–583. doi:10.1038/nmeth.3869.
- 468 Caminero, A., Nistal, E., Herrán, A. R., Pérez-Andrés, J., Ferrero, M. A., Vaquero Ayala, L., et  
469 al. (2015). Differences in gluten metabolism among healthy volunteers, coeliac disease  
470 patients and first-degree relatives. *Br. J. Nutr.* 114, 1157–1167.  
471 doi:10.1017/S0007114515002767.
- 472 Couvigny, B., de Wouters, T., Kaci, G., Jacouton, E., Delorme, C., Doré, J., et al. (2015).  
473 Commensal *Streptococcus salivarius* Modulates PPAR $\gamma$  Transcriptional Activity in Human  
474 Intestinal Epithelial Cells. *PLoS One* 10, e0125371. doi:10.1371/journal.pone.0125371.
- 475 Davis, N. M., Proctor, D., Holmes, S. P., Relman, D. A., and Callahan, B. J. (2017). Simple  
476 statistical identification and removal of contaminant sequences in marker-gene and  
477 metagenomics data. *bioRxiv*, 221499. doi:10.1101/221499.
- 478 de Sousa Moraes, L. F., Grzeskowiak, L. M., de Sales Teixeira, T. F., and do Carmo Gouveia  
479 Peluzio, M. (2014). Intestinal microbiota and probiotics in celiac disease. *Clin. Microbiol.*  
480 *Rev.* 27, 482–489. doi:10.1128/CMR.00106-13.
- 481 Dixon, P. (2003). VEGAN, a package of R functions for community ecology. *J. Veg. Sci.* 14,

482 927–930. doi:10.1111/j.1654-1103.2003.tb02228.x.

483 Engstrom, N., Sandberg, A. S., and Scheers, N. (2015). Sourdough fermentation of wheat flour  
484 does not prevent the interaction of transglutaminase 2 with ??2-gliadin or gluten. *Nutrients*  
485 7, 2134–2144. doi:10.3390/nu7042134.

486 Fernandez-Feo, M., Wei, G., Blumenkranz, G., Dewhirst, F. E., Schuppan, D., Oppenheim, F.  
487 G., et al. (2013). The cultivable human oral gluten-degrading microbiome and its potential  
488 implications in coeliac disease and gluten sensitivity. *Clin. Microbiol. Infect.* 19, 1–14.  
489 doi:10.1111/1469-0691.12249.

490 Hadley Wickham (2016). *ggplot2: Elegant Graphics for Data Analysis* info. Springer-Verlag  
491 New York Available at: <https://cran.r-project.org/web/packages/ggplot2/citation.html>  
492 [Accessed July 31, 2018].

493 Iwai, S., Weinmaier, T., Schmidt, B. L., Albertson, D. G., Poloso, N. J., Dabbagh, K., et al.  
494 (2016). Piphillin: Improved Prediction of Metagenomic Content by Direct Inference from  
495 Human Microbiomes. *PLoS One* 11, e0166104. doi:10.1371/journal.pone.0166104.

496 Jabri, B., and Sollid, L. M. (2006). Mechanisms of Disease: immunopathogenesis of celiac  
497 disease. *Nat. Clin. Pract. Gastroenterol. Hepatol.* 3, 516–525. doi:10.1038/ncpgasthep0582.

498 Kagnoff, M. F. (2007). Celiac disease: pathogenesis of a model immunogenetic disease. *J. Clin.*  
499 *Invest.* 117, 41–9. doi:10.1172/JCI30253.

500 Lebowhl, B., Blaser, M. J., Ludvigsson, J. F., Green, P. H. R., Rundle, A., Sonnenberg, A., et al.  
501 (2013). Decreased risk of celiac disease in patients with *Helicobacter pylori* colonization.  
502 *Am. J. Epidemiol.* 178, 1721–30. doi:10.1093/aje/kwt234.

503 Leo, L., and Shetty, S. (2017). microbiome R package. *Bioconductor*.

504 Love, M. I., Huber, W., and Anders, S. (2014). Moderated estimation of fold change and

505 dispersion for RNA-seq data with DESeq2. *Genome Biol.* 15, 550. doi:10.1186/s13059-014-  
506 0550-8.

507 Makharia, G. K., Verma, A. K., Amarchand, R., Bhatnagar, S., Das, P., Goswami, A., et al.  
508 (2011). Prevalence of celiac disease in the northern part of India: A community based study.  
509 *J. Gastroenterol. Hepatol.* 26, 894–900. doi:10.1111/j.1440-1746.2010.06606.x.

510 Martin, M. (2011). Cutadapt removes adapter sequences from high-throughput sequencing reads.  
511 *EMBnet.journal* 17, 10. doi:10.14806/ej.17.1.200.

512 McCarville, J. L., Dong, J., Caminero, A., Bermudez-Brito, M., Jury, J., Murray, J. A., et al.  
513 (2017). A commensal *Bifidobacterium longum* strain improves gluten-related  
514 immunopathology in mice through expression of a serine protease inhibitor. *Appl. Environ.*  
515 *Microbiol.* 83, e01323-17. doi:10.1128/AEM.01323-17.

516 McMurdie, P. J., and Holmes, S. (2013). Phyloseq: An R Package for Reproducible Interactive  
517 Analysis and Graphics of Microbiome Census Data. *PLoS One* 8, e61217.  
518 doi:10.1371/journal.pone.0061217.

519 Morrison, D. J., and Preston, T. (2016). Formation of short chain fatty acids by the gut  
520 microbiota and their impact on human metabolism. *Gut Microbes* 7, 189–200.  
521 doi:10.1080/19490976.2015.1134082.

522 Ohira, H., Tsutsui, W., and Fujioka, Y. (2017). Are Short Chain Fatty Acids in Gut Microbiota  
523 Defensive Players for Inflammation and Atherosclerosis? *J. Atheroscler. Thromb.* 24, 660–  
524 672. doi:10.5551/jat.RV17006.

525 Olivares, M., Walker, A. W., Capilla, A., Benítez-Páez, A., Palau, F., Parkhill, J., et al. (2018).  
526 Gut microbiota trajectory in early life may predict development of celiac disease.  
527 *Microbiome* 6, 36. doi:10.1186/s40168-018-0415-6.

- 528 Park, M.-S., Hill, C. M., Li, Y., Hardy, R. K., Khanna, H., Khang, Y.-H., et al. (2004). Catalytic  
529 properties of the PepQ prolidase from *Escherichia coli*. *Arch. Biochem. Biophys.* 429, 224–  
530 230. doi:10.1016/J.ABB.2004.06.022.
- 531 Parks, D. H., Tyson, G. W., Hugenholtz, P., and Beiko, R. G. (2014). STAMP: statistical  
532 analysis of taxonomic and functional profiles. *Bioinformatics* 30, 3123–4.  
533 doi:10.1093/bioinformatics/btu494.
- 534 Png, C. W., Lind, S. K., Gilshenan, K. S., Zoetendal, E. G., Mcsweeney, C. S., Sly, L. I., et al.  
535 (2010). Mucolytic Bacteria With Increased Prevalence in IBD Mucosa Augment In Vitro  
536 Utilization of Mucin by Other Bacteria. *Am J Gastroenterol* 2010; 105, 2420–2428.  
537 doi:10.1038/ajg.2010.281.
- 538 Rintala, A., Riikonen, I., Toivonen, A., Pietilä, S., Munukka, E., Pursiheimo, J.-P., et al. (2018).  
539 Early fecal microbiota composition in children who later develop celiac disease and  
540 associated autoimmunity. *Scand. J. Gastroenterol.* 53, 403–409.  
541 doi:10.1080/00365521.2018.1444788.
- 542 Ritari, J., Salojärvi, J., Lahti, L., and de Vos, W. M. (2015). Improved taxonomic assignment of  
543 human intestinal 16S rRNA sequences by a dedicated reference database. *BMC Genomics*  
544 16, 1056. doi:10.1186/s12864-015-2265-y.
- 545 Rivière, A., Selak, M., Lantin, D., Leroy, F., and De Vuyst, L. (2016). Bifidobacteria and  
546 butyrate-producing colon bacteria: Importance and strategies for their stimulation in the  
547 human gut. *Front. Microbiol.* 7. doi:10.3389/fmicb.2016.00979.
- 548 Sánchez, E., Laparra, J. M., and Sanz, Y. (2012). Discerning the role of *Bacteroides fragilis* in  
549 celiac disease pathogenesis. *Appl. Environ. Microbiol.* 78, 6507–6515.  
550 doi:10.1128/AEM.00563-12.



- 551 Sanz, Y., and Pama, G. De (2011). Unraveling the Ties between Celiac Disease and Intestinal  
552 Microbiota. *Int Rev Immunol* 30, 207–218. doi:10.3109/08830185.2011.599084.
- 553 Schneeberger, M., Everard, A., Gómez-Valadés, A. G., Matamoros, S., Ramírez, S., Delzenne,  
554 N. M., et al. (2015). Akkermansia muciniphila inversely correlates with the onset of  
555 inflammation, altered adipose tissue metabolism and metabolic disorders during obesity in  
556 mice. *Sci. Rep.* 5, 16643. doi:10.1038/srep16643.
- 557 Shetty, S. A., Hugenholtz, F., Lahti, L., Smidt, H., and de Vos, W. M. (2017). Intestinal  
558 microbiome landscaping: insight in community assemblage and implications for microbial  
559 modulation strategies. *FEMS Microbiol. Rev.* 41, 182–199. doi:10.1093/femsre/fuw045.
- 560 Singh P, Arora A, Strand TA, Leffler D, Catassi C, Green PH, Kelly CP, Ahuja V, M. G., and G  
561 Global prevalence of celiac disease: Systematic review and Meta-analysis. *Gastroenterol*  
562 *Hepatol.* (in press)
- 563 Singh, P., Arora, S., Lal, S., Strand, T. A., and Makharia, G. K. (2015). Risk of Celiac Disease in  
564 the First- and Second-Degree Relatives of Patients With Celiac Disease: A Systematic  
565 Review and Meta-Analysis. *Am. J. Gastroenterol.* 110, 1539–1548.  
566 doi:10.1038/ajg.2015.296.
- 567 Tian, N., Faller, L., Leffler, D. A., Kelly, C. P., Hansen, J., Bosch, J. A., et al. (2017). Salivary  
568 gluten degradation and oral microbial profiles in healthy individuals and celiac disease  
569 patients. *Appl. Environ. Microbiol.* 83. doi:10.1128/AEM.03330-16.
- 570 Tjellström, B., Stenhammar, L., Högberg, L., Fälth-Magnusson, K., Magnusson, K.-E.,  
571 Midtvedt, T., et al. (2007). Gut microflora associated characteristics in first-degree relatives  
572 of children with celiac disease. *Scand. J. Gastroenterol.* 42, 1204–1208.  
573 doi:10.1080/00365520701320687.

574 van de Wal, Y., Kooy, Y. M., van Veelen, P. a, Peña, S. a, Mearin, L. M., Molberg, O., et al.  
575 (1998). Small intestinal T cells of celiac disease patients recognize a natural pepsin  
576 fragment of gliadin. *Proc. Natl. Acad. Sci. U. S. A.* 95, 10050–10054.  
577 doi:10.1073/pnas.95.17.10050.

578 Verdu, E. F., Galipeau, H. J., and Jabri, B. (2015). Novel players in coeliac disease pathogenesis:  
579 role of the gut microbiota. *Nat Rev Gastroenterol Hepatol* 12, 497–506.  
580 doi:10.1038/nrgastro.2015.90.

581 Villanacci, V., Bassotti, G., Liserre, B., Lanzini, A., Lanzarotto, F., and Genta, R. M. (2006).  
582 *Helicobacter pylori* Infection in Patients with Celiac Disease. *Am. J. Gastroenterol.* 101,  
583 1880–1885. doi:10.1111/j.1572-0241.2006.00621.x.

584 Ze, X., Duncan, S. H., Louis, P., and Flint, H. J. (2012). *Ruminococcus bromii* is a keystone  
585 species for the degradation of resistant starch in the human colon. *ISME J.* 6, 1535–1543.  
586 doi:10.1038/ismej.2012.4.

587 Zeng, M. Y., Inohara, N., and Nuñez, G. (2017). Mechanisms of inflammation-driven bacterial  
588 dysbiosis in the gut. *Mucosal Immunol.* 10, 18–26. doi:10.1038/mi.2016.75.

589  
590  
591  
592  
593  
594  
595  
596

597

598 **Table 1: Demographic characteristics on study subjects**

| Groups | No. of subjects | Age (mean±S.D.) | Gender |    | Sampling site |    | Villous abnormalities (as per Modified Marsh criteria) |   |    |    |    | HLA Haplotype |     |          | tTG Titre (mean±SD) |
|--------|-----------------|-----------------|--------|----|---------------|----|--------------------------------------------------------|---|----|----|----|---------------|-----|----------|---------------------|
|        |                 |                 | M      | F  | S             | B  | 0                                                      | 1 | 3a | 3b | 3c | DQ2           | DQ8 | DQ2+DQ8+ |                     |
| CeD    | 23              | 23.4±9.5        | 10     | 13 | 21            | 16 | 0                                                      | 0 | 2  | 7  | 14 | 22            | 1   | 0        | 199.9±72.1          |
| FDR    | 15              | 31.6±10.8       | 6      | 9  | 15            | 13 | 15                                                     | 0 | 0  | 0  | 0  | 13            | 0   | 2        | 4.36±2.6            |
| DC     | 24              | 30.6±12.3       | 22     | 2  | 23            | 14 | 22                                                     | 2 | 0  | 0  | 0  | 6             | 0   | 0        | 4.09±2.8            |

599 M= male, F= female, tTG= Tissue transglutaminase, S= Stool samples, B= Biopsy sample

600

601 **Figure Legends**

602 Figure 1: a. Comparison of alpha diversity between diagnosis groups in duodenal biopsies.

603 b. Comparison of alpha diversity between diagnosis groups in Faecal samples.

604 c. Principle coordinates analysis of bacterial community based on bray-curtis distance between  
605 diagnosis groups in duodenal biopsy samples.

606 d. Principle coordinates analysis of bacterial community based on bray-curtis distance between  
607 diagnosis groups in faecal samples

608 Figure 2: Comparison of differential abundance of bacterial taxa between the diagnosis groups in

609 biopsy samples. a. Differential abundance DC vs FDR b. Differential abundance CeD vs DC c.

610 Differential abundance CeD vs FDR. Only taxa with significant differences ( $P < 0.01$ ) in log<sub>2</sub>

611 fold change are depicted.

612 Figure 3: Comparison of differential abundance of bacterial taxa between the diagnosis groups in  
613 faecal samples. a. Differential abundance CeD vs DC. b. Differential abundance CeD vs FDR.  
614 Only taxa with significant differences ( $P < 0.01$ ) in average log<sub>2</sub> fold change are depicted.

615 Figure 4: KO abundance for Xaa-pro dipeptidase (K01271) enzyme in faeces inferred from  
616 predicted metagenome for faecal samples. Comparison was done using ANOVA.

617 Supplementary file, Figure S1:

618 a. Principal coordinates analysis (PCoA) of bacterial community in the faecal and duodenal  
619 biopsies based on Bray–Curtis distance.

620 b. Comparison of alpha diversity measures between sampling sites.

621 Supplementary file, Figure S2: Phylum level distribution of ASVs in biopsy samples. Pairwise  
622 comparisons were done using Wilcoxon tests.

623 Supplementary file, Figure S3: Order level distribution of ASVs in biopsy samples. Pairwise  
624 comparisons were done using Wilcoxon tests.

625 Supplementary file, Figure S4: Phylum level distribution of ASVs in faecal samples. Pairwise  
626 comparisons were done using Wilcoxon tests.

627 Supplementary file, Figure S5: Order level distribution of ASVs in faecal samples. Pairwise  
628 comparisons were done using Wilcoxon tests.

629 Supplementary Table 1: Significantly different KEGG orthologies (KO) between diagnosis  
630 groups

631 Supplementary Table 2: Details of study subjects

632 Supplementary Table 3: Number of reads per sample at each stage of analysis.

633 Supplementary Information document: Differential Abundance of Amplicon Sequence Variant  
634 of *Helicobacter*. Multiple sequence alignment was performed by CLUSTAL 2.0.11

**a) Duodenum**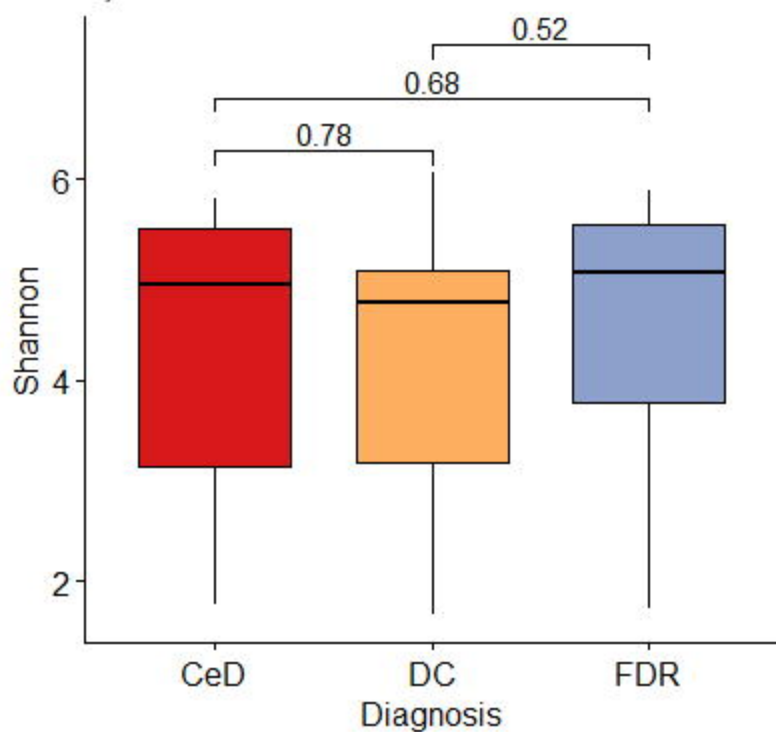**b) Faeces**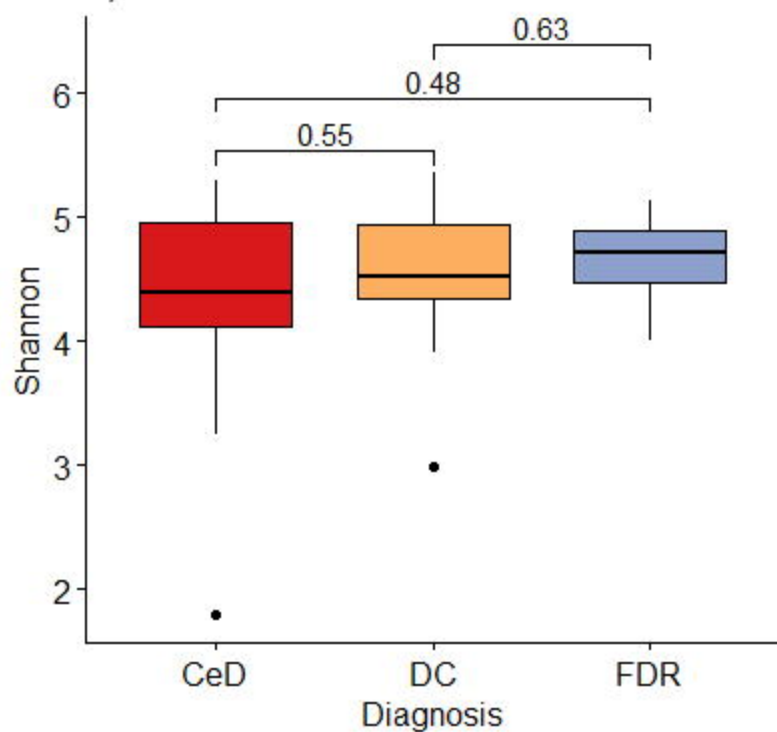**c) Duodenum**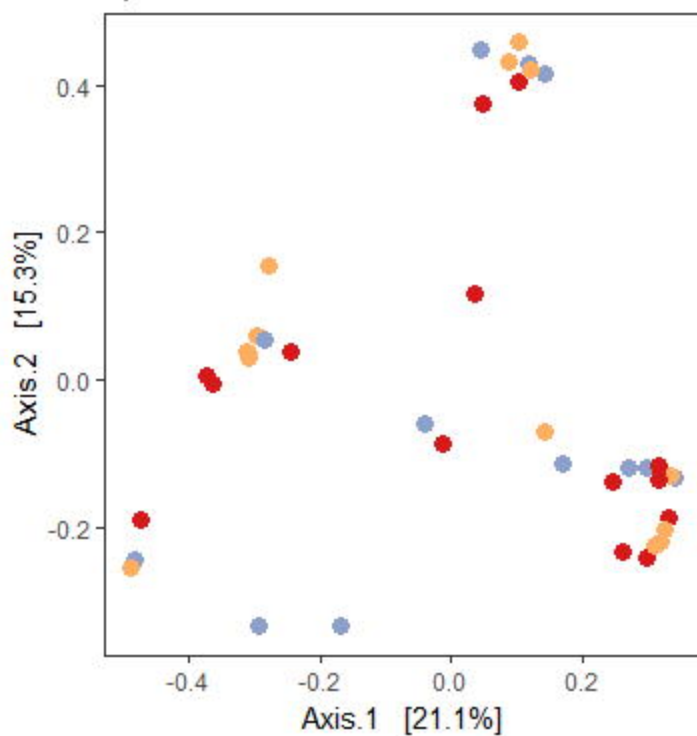**d) Faeces**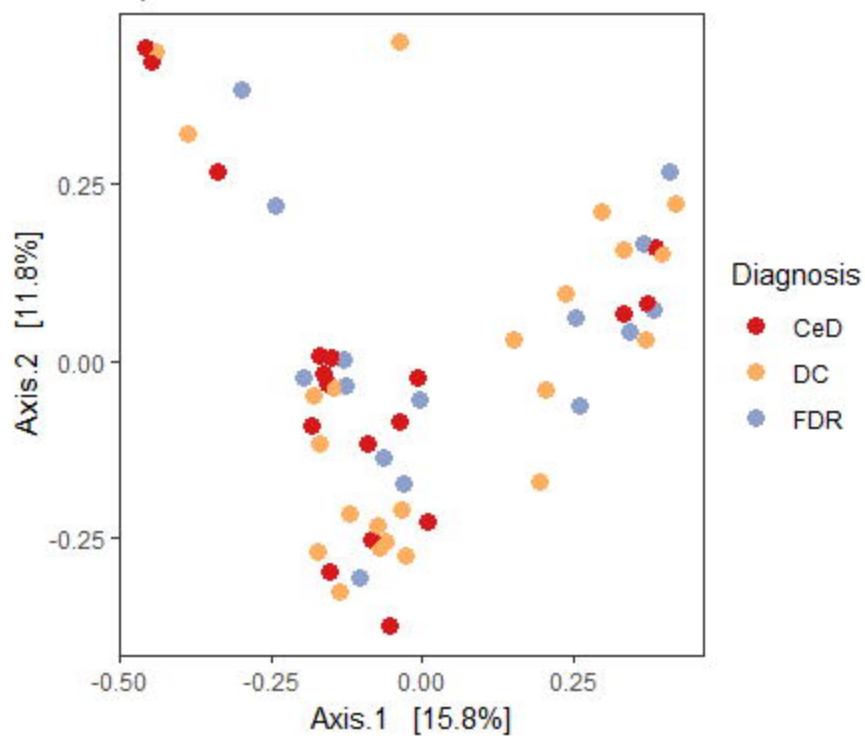

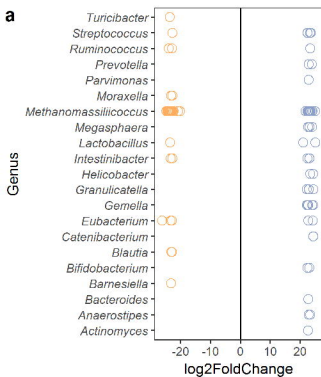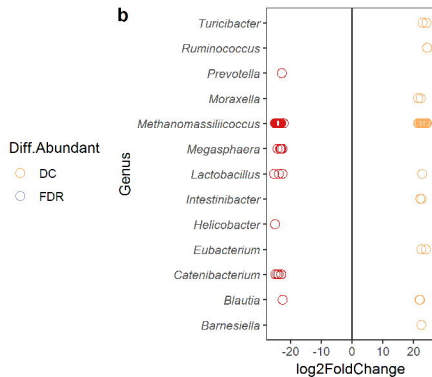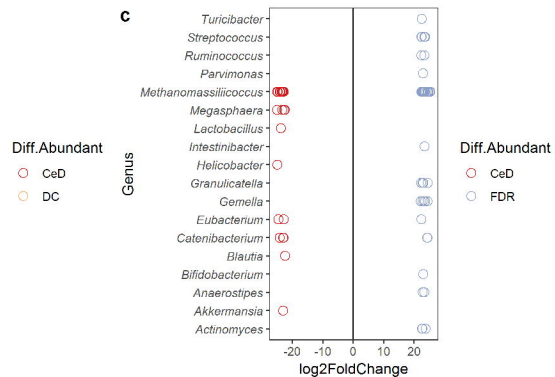

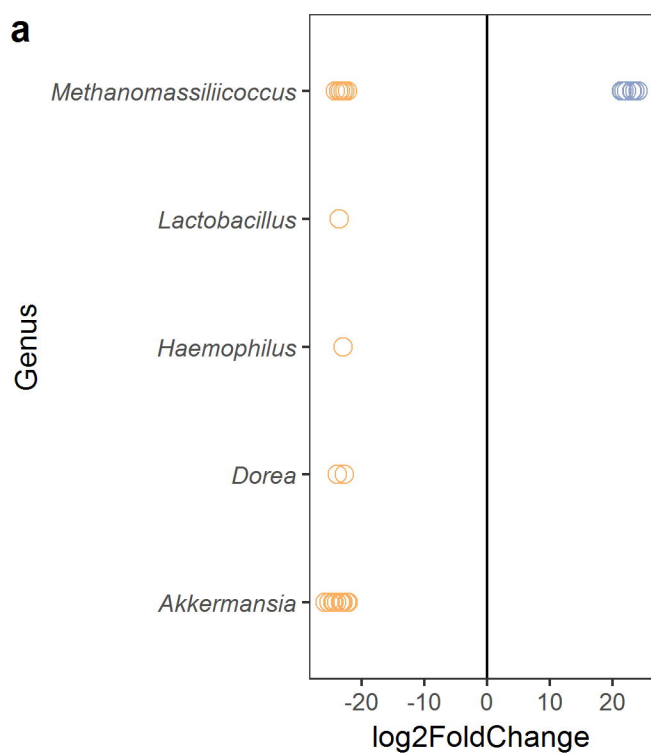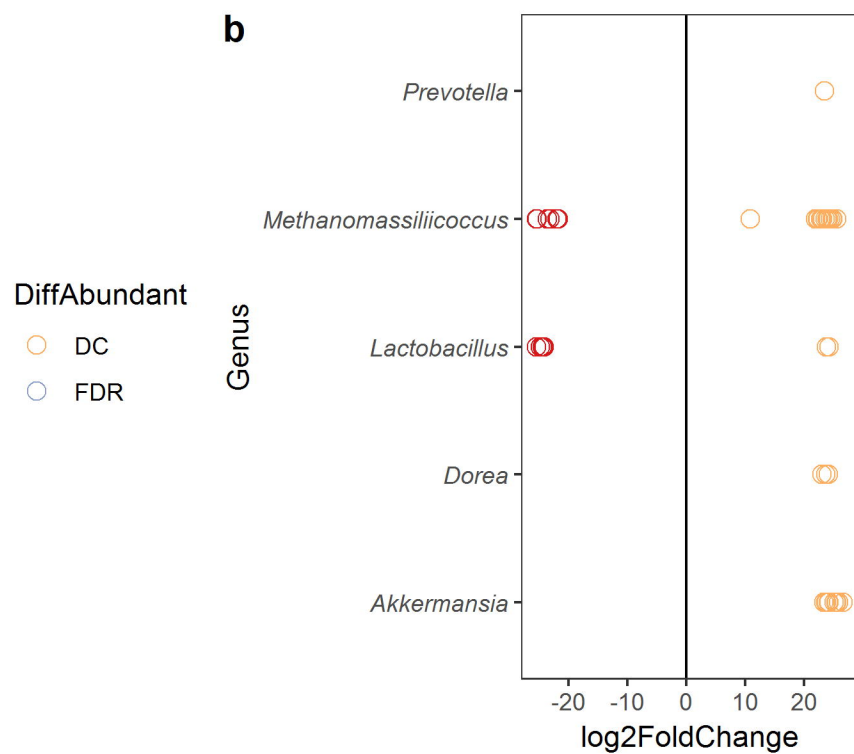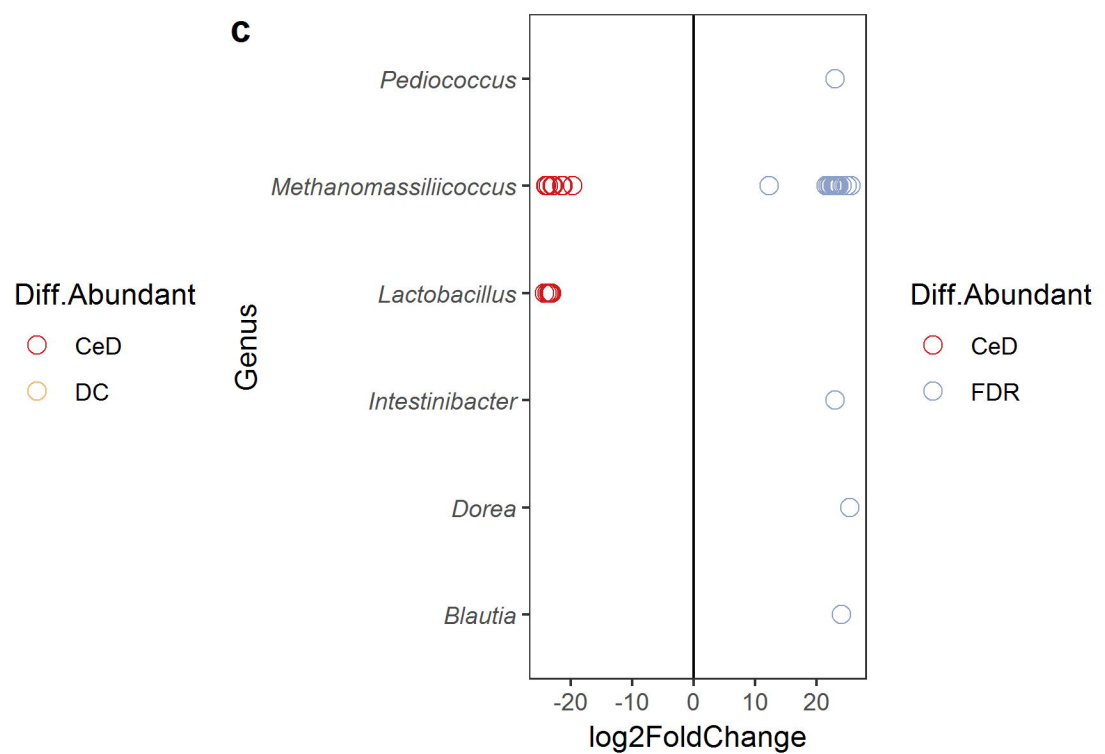

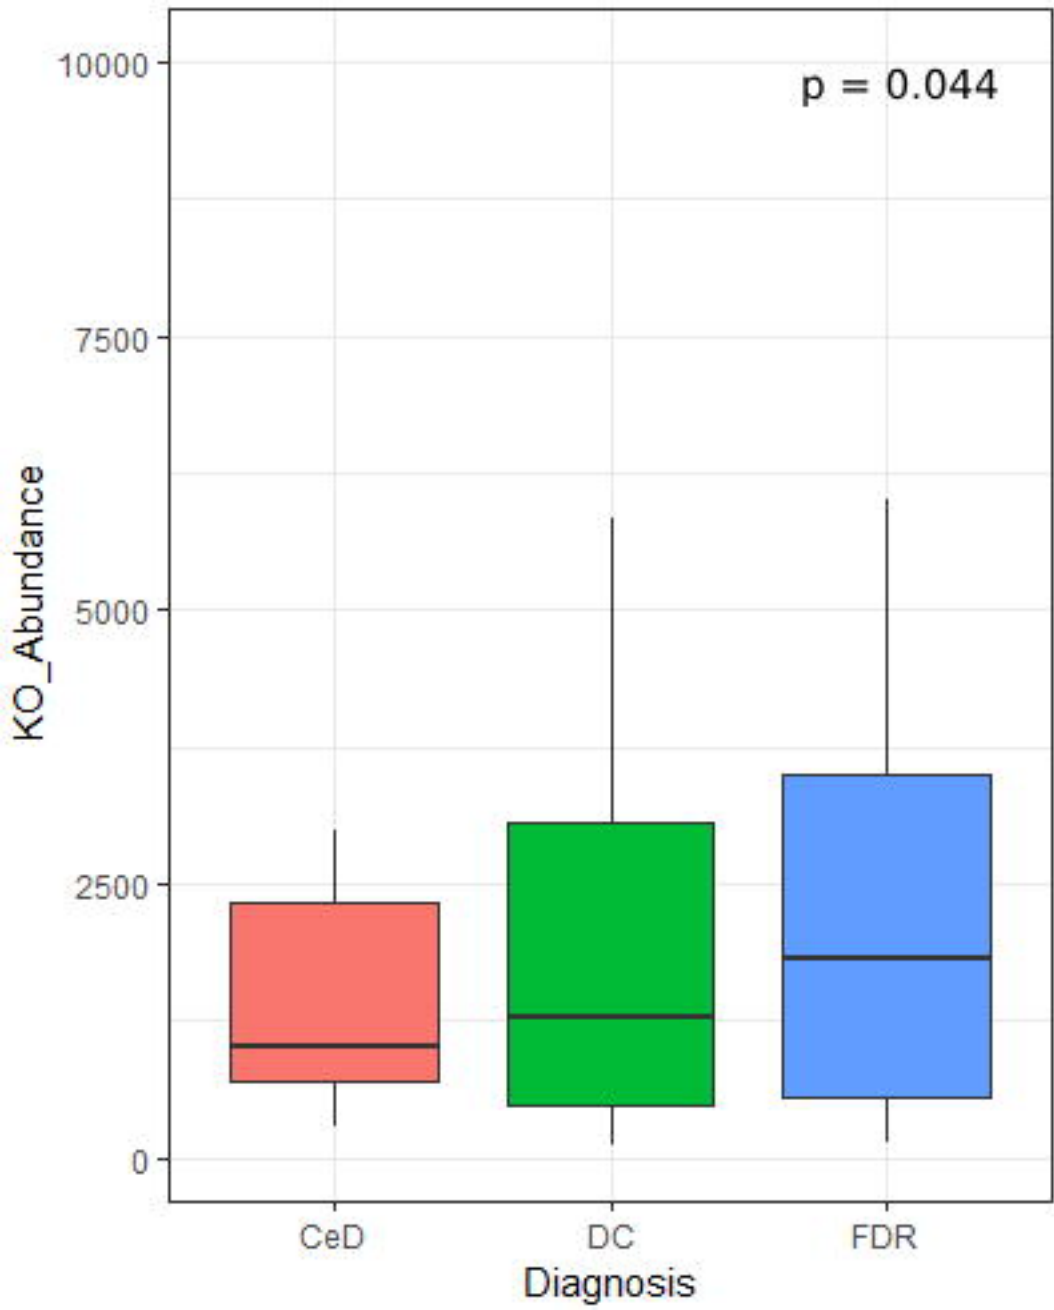

Source: https://www.biorxiv.org/content/10.1101/227272v3.full.pdf
